# Supplementary material for: Ni–CdS composited with ZnO for improved surface reaction and charge efficiency for photocatalytic hydrogen production from formic acid
Source: Royal Society of Chemistry journal article supplement (doi:10.1039/d5cp01271f), 2025-01-01
Supplement: d5cp01271f1.pdf [file d5cp01271f1.pdf]

## Supplementary data

### **Ni-CdS composited with ZnO for improved surface reaction and charge efficiency for photocatalytic hydrogen production from formic acid**

Yanzhao Zou <sup>a, b</sup>, Shan Yu <sup>a, b, \*</sup>, Shiyao Cao <sup>c</sup>, Xinxin Lu <sup>c</sup>, Ying Zhou <sup>a, b, \*</sup>

<sup>a</sup> National Key Laboratory of Oil and Gas Reservoir Geology and Exploitation, Southwest Petroleum University, Chengdu 610500, China

<sup>b</sup> School of New Energy and Materials, Southwest Petroleum University, Chengdu 610500, China

<sup>c</sup> PetroChina Shenzhen New Energy Research Institute Co.,Ltd, Shenzhen 518057, China

\* E-mail: [yushan@swpu.edu.cn](mailto:yushan@swpu.edu.cn); [yzhou@swpu.edu.cn](mailto:yzhou@swpu.edu.cn)

Tel: +86-28-83037890

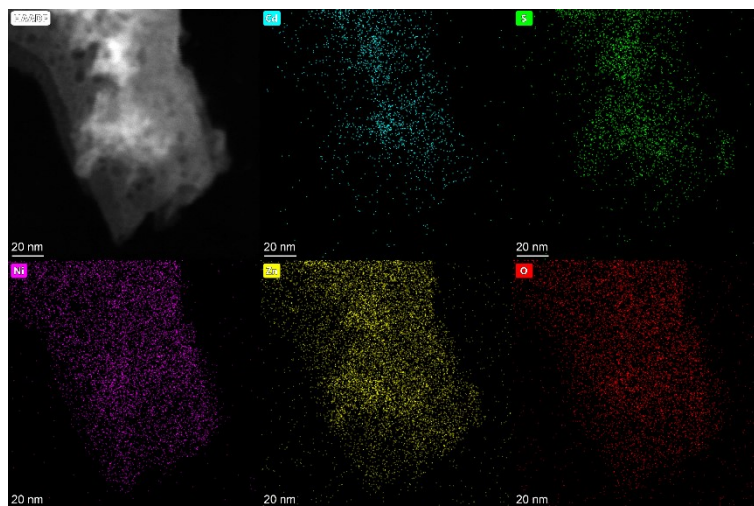

**Fig. S1.** The EDS spectrum of Ni-CdS@ZnO-10.

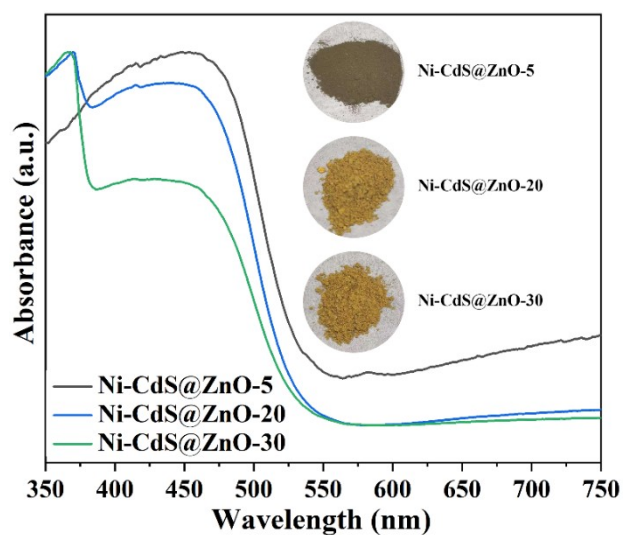

**Fig. S2.** The UV-Vis adsorption spectra and photographs of Ni-CdS@ZnO-X (X=5, 20, 30).

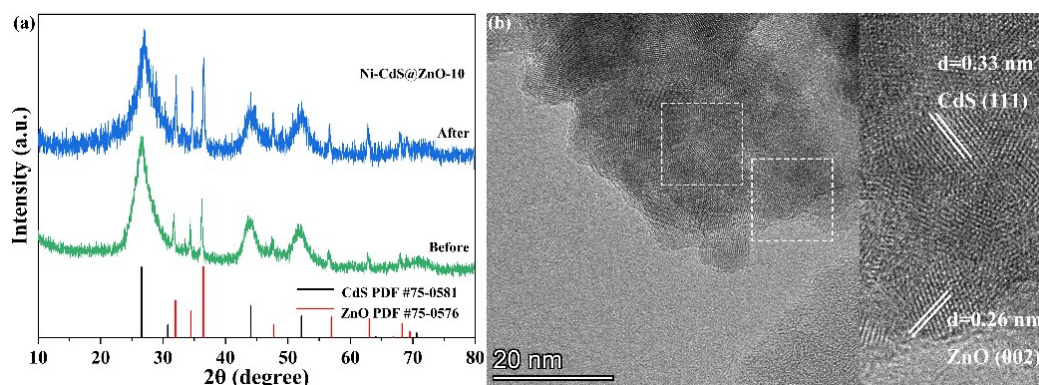

**Fig. S3.** The XRD and TEM of Ni-CdS@ZnO-10 photocatalyst after photocatalytic reaction.

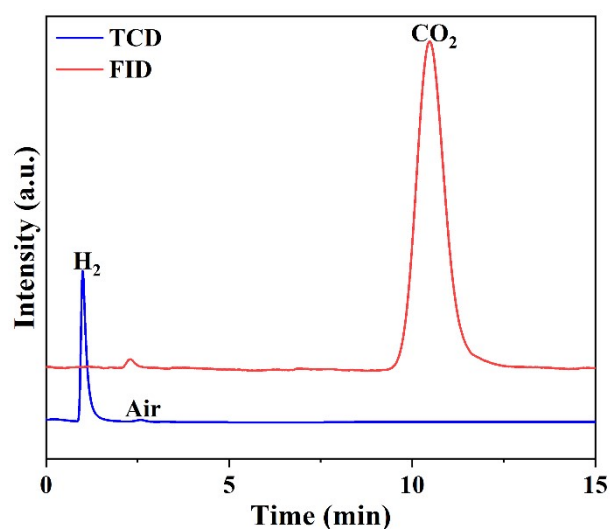

**Fig. S4.** The gas chromatography results of photocatalytic formic acid decomposition over Ni-CdS@ZnO-10.

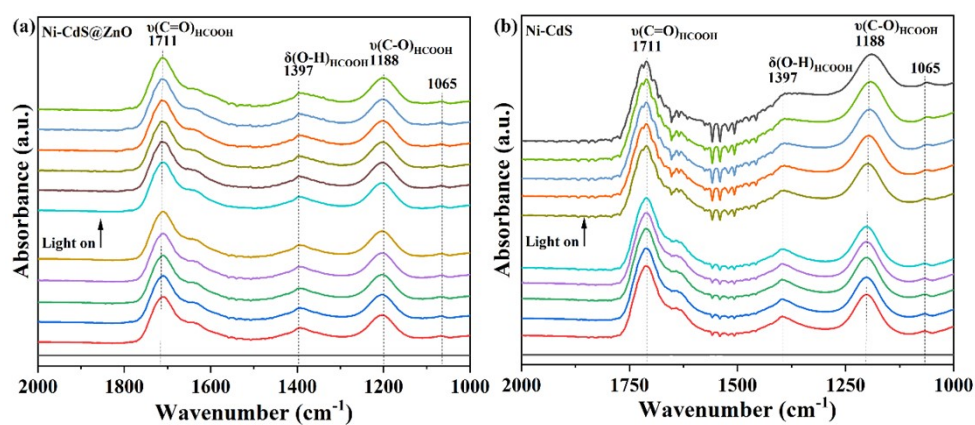

**Fig. S5.** In situ ATR infrared spectra of Ni-CdS@ZnO (a) and Ni-CdS (b) for photocatalytic formic acid decomposition.

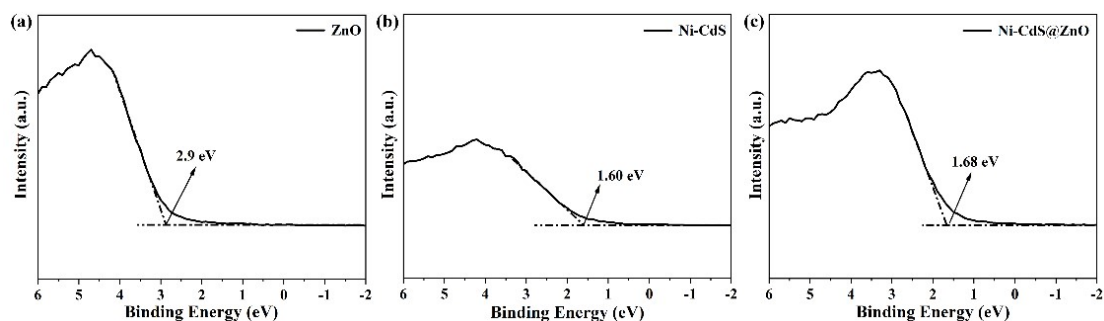

**Fig. S6.** The valence band of ZnO, Ni-CdS and Ni-CdS@ ZnO-10.

**Table S1.** H<sub>2</sub>O-TPD integral area statistics of Ni-CdS@ZnO-10 and Ni-CdS.

| Regions  | Integral area |        |
|----------|---------------|--------|
|          | Ni-CdS@ZnO-10 | Ni-CdS |
| Type I   | 20.0          | 21.3   |
| Type II  | 22.8          | 9.1    |
| Type III | 14.3          | 6.0    |

## Experiments

### 1. Synthesis of Ni-CdS

In detail, 1 mmol CdCl<sub>2</sub>·2.5H<sub>2</sub>O was dispersed in 110 mL water and heated at 80 °C with powerful stirring. Subsequently, an excessive amount of Na<sub>2</sub>S (5 mmol) was dissolved in 10 mL of deionized water and injected into the reactor quickly. After stirring at 80 °C for 2 hours, 0.6 mmol nickel acetate were added into the reactor for another hour. After that, the metal-modified cadmium sulfide was obtained via centrifugation and drying, and noted as Ni-CdS.

### 2. Photocatalytic hydrogen evolution from formic acid

The specific experimental parameters are as follows: the light intensity was 135 mW/cm<sup>2</sup>, and the stirring rate was 300 r/min. 5 mg photocatalyst was added into 30 mL formic acid solution (5 mol/L), followed by 10 min degas operation with argon to discharge other gases in this system. Subsequently, the prepared reactor was put into a multichannel photochemical reaction system to decompose formic acid. The generated gases (H<sub>2</sub>, CO and CO<sub>2</sub>) were detected via gas chromatograph (Techcomp GC-7900, China, Ar carrier gas) and calculated with the external standard method. The recycling test was carried out according to the same test condition above.
